# Supplementary material
Source: MDPI journal article supplement (https://www.mdpi.com/2571-6255/4/2/29)
Supplement: s1 [file s1]

# Supplementary Material

## Paleoecological methods

The modern vegetation of the sampled peat bogs include *Caricetum carpetanae* communities dominated by *Carex nigra*, *C. echinata* and *Parnassia palustris* (Sánchez-Mata 1989). The forests of the area include Maritime pine (*Pinus pinaster*), and *Pinus nigra* subsp. *salzmannii* and *Pinus sylvestris* woodlands with *Genista cinerascens* and *Festuca elegans* subsp. *merinoi* (López-Sáez *et al.* 2016). Overall, the high-supramediterranean belt, above the treeline, is dominated by grasslands and shrublands (*Juniperus communis*, *Cytisus oromediterraneus*, *Echinopartum ibericum*).

A 50-cm sediment core was extracted from the peat bog in October 2000 using a Russian corer with a diameter of 50 mm. Peat sections were individually sealed and stored at 4°C prior to laboratory sub-sampling at 1 cm intervals. Five peat samples were <sup>14</sup>C dated using AMS technique (Table S1). at the Centro Nacional de Aceleradores (Sevilla, Spain). Radiocarbon dates were calibrated in years cal AD with the CALIB 7.10 software using the calibration curve IntCal13 (Reimer *et al.* 2013). Dates are expressed as intercepts with 2σ ranges. An age-depth model was produced using Clam 2.2 software (Blaauw 2010). The best fit was obtained applying a smoothing spline to the available radiocarbon dates.

Pollen analysis was carried out on 50 sub-samples of 1 cm<sup>3</sup> along the core. Standard pollen extraction techniques were used (Faegri and Iversen 1989). Pollen counts of up to 400 grains total land pollen (TLP) per sample were identified and counted. Percentages were calculated based on TLP sum excluding wetland taxa and non-pollen palynomorphs (NPPs). Pollen diagrams were produced using Tilia and Tilia-Graph v. 2.0.b.5 software (Grimm 1992, 2004). Pollen grains, spores and NPPs were identified using palynological keys and photo atlases (Moore *et al.* 1991; Reille 1999; Cugny *et al.* 2010). Local pollen assemblage zones (LPAZs) were defined on the basis of agglomerative cluster analysis of incremental sum of squares (Coniss) with square root transformed percentage data (Grimm 1987). The number of statistically significant zones was determined using the broken-stick model (Bennett 1996).

Contiguous 1 cm<sup>3</sup> sub-samples were retrieved at 1 cm intervals for macroscopic charcoal analysis. Samples were soaked in a 10% NaOH solution for 24 h to disaggregate organic silts, then in a 6% H<sub>2</sub>O<sub>2</sub> solution (24 h) to bleach the remaining non-charcoal organic material and thus make charcoal identification easier (Carcaillet *et al.*, 2001). Samples were sieved through a 150 μm mesh. The total number of macrocharcoal particles was counted using a stereomicroscope in order to estimate past changes in fire activity at a local scale (Whitlock and Larsen 2001, Higuera *et al.* 2007, Brown *et al.* 2013). Charcoal accumulation rate (CHAR) was calculated by sedimentation rate (cm year<sup>-1</sup>) and is expressed in particles cm<sup>-2</sup> year<sup>-1</sup> (Long and Whitlock 2002).

**Table S1.** Accelerator Mass Spectrometry radiocarbon (AMS-<sup>14</sup>C) data with 2σ range of calibration from “Arroyo de Aguas Frías” peat bog.

| Laboratory code | Depth (cm) | AMS <sup>14</sup> C age BP<br>(yrs.) | Age cal AD | Mean Age cal AD |
|-----------------|------------|--------------------------------------|------------|-----------------|
| CNA-111         | 50         | 230 ± 30                             | 1532-1950  | 1737            |
| CNA-112         | 37         | 143 ± 20                             | 1669-1944  | 1802            |

|         |    |         |           |      |
|---------|----|---------|-----------|------|
| CNA-113 | 33 | 75 ± 30 | 1691-1923 | 1847 |
| CNA-114 | 25 | 67 ± 20 | 1696-1919 | 1868 |
| CNA-115 | 19 | 10 ± 30 | 1690-1960 | 1900 |

## References

1. Bennett KD (1996) Determination of the number of zones in a biostratigraphical sequence. *New Phytologist* 132, 155–170.
2. Blaauw M (2010) Methods and code for “classical” age-modelling of radiocarbon sequences. *Quaternary Geochronology* 5, 512–518.
3. Brown KJ, Power MJ (2013) ‘Charred Particle Analysis’. *Encyclopedia of Quaternary Science*, pp. 716–729 (Elsevier: Amsterdam).
4. Carcaillet C, Bouvier M, Frechette B, Larouche AC, Richard PJH (2001) Comparison of pollen slide and sieving methods in lacustrine charcoal analyses for local and regional fire history. *The Holocene* 11, 467–476.
5. Cugny C, Mazier F, Galop D (2010) Modern and fossil non-pollen palynomorphs from the Basque mountains (western Pyrenees, France): the use of coprophilous fungi to reconstruct pastoral activity. *Vegetation History and Archaeobotany* 19, 391–408.
6. Faegri K, Iversen J (1989) ‘Textbook of pollen analysis.’ (John Wiley: Chichester)
7. Grimm EC (1987) Coniss: a Fortran 77 program for stratigraphically constrained cluster analysis by the method of incremental sum of squares. *Computer and Geosciences* 13, 13–35.
8. Grimm EC (1992) ‘Tilia, version 2.’ (Illinois State Museum: Springfield)
9. Grimm EC (2004) ‘TGView’ (Illinois State Museum: Springfield)
10. Higuera PE, Peters ME, Brubaker LB, Gavin DG (2007) Understanding the origin and analysis of sediment-charcoal records with a simulation model. *Quaternary Science Reviews* 26, 1790–1809.
11. Long CJ, Whitlock C (2002) Fire and vegetation history from the coastal rain forest of the Western Oregon Coast Range. *Quaternary Research* 58, 215–225.
12. López-Sáez JA, Sánchez-Mata D, Gavilán RG (2016) Syntaxonomical update on the relict groves of Scots pine (*Pinus sylvestris* L. var. *iberica* Svoboda) and Spanish black pine (*Pinus nigra* Arnold subsp. *salzmannii* (Dunal) Franco) in the Gredos range (central Spain). *Lazarroa* 37, 153–172.
13. Moore PD, Webb JA, Collinson ME (Eds) (1991) ‘Pollen analysis.’ (Blackwell: Oxford)
14. Reille M (1999) ‘Pollen and spores from Europe and North Africa.’ (Laboratoire de Botanique Historique et Palynologie: Marseille)
15. Reimer PJ, Bard E, Bayliss A, Beck JW, Blackwell PG, Bronk Ramsey C, Buck CE, Cheng H, Edwards RL, Friedrich M, Grootes PM, Guilderson TP, Haflidason H, Hajdas I, Hatté C, Heaton TJ, Hoffmann DL, Hogg AG, Hughen KA, Kaiser KF, Kromer B, Manning SW, Niu M, Reimer RW, Richards DA, Scott EM, Southon JR, Staff RA, Turney CSM, Van der Plicht J (2013) Intcal13 and marine13 radiocarbon age calibration curves 0–50,000 years cal BP. *Radiocarbon* 55, 1869–1887.
16. Sánchez-Mata D (1989) ‘Flora y vegetación del Macizo Oriental de la Sierra de Gredos (Ávila).’ (Institución Gran Duque de Alba: Ávila).
17. Whitlock C, Larsen C (2001) Charcoal as a fire proxy. In Smol JP, Birks HJB, Last WM. (Eds.) ‘Tracking environmental change using lake sediments, vol. 3: terrestrial, algal, and siliceous indicators’, pp. 75–96 (Kluwer: Dordrecht).
