# Supplementary material
Source: MDPI journal article supplement (https://www.mdpi.com/2571-6255/4/2/29)
Supplement: s1 [file s1]

Archive with 1 entries (1 files):
- fire-1211321-supplementary.pdf
